# Supplementary material
Source: Springer Nature journal article supplement (https://www.springermedizin.de/resource/supplementary/13002_2007_117_MOESM1_ESM.pdf/9627192)
Supplement: MOESM1 [file 9627192]

Additional file 1. Wild food plants (cited by  $\geq 3$  informants) traditionally consumed and number of informants that mentioned each food- use in the survey areas. N, Nablus; Q, Qalqilia; J, Jenin; T, Tulkarm; S, Salfit.

| Latin name                                                     | Arabic common name     | No. of informants | N      | Q      | J | T | S | Food use category | Part used, way of consumption                                                     |
|----------------------------------------------------------------|------------------------|-------------------|--------|--------|---|---|---|-------------------|-----------------------------------------------------------------------------------|
| <b>Anacardiaceae</b>                                           |                        |                   |        |        |   |   |   |                   |                                                                                   |
| <i>Pistacia lentiscus</i> L. *                                 | <i>Sarrees</i>         | 25                | 9      | 5      |   |   | 2 | Fruits            | Seeds, eaten raw or roasted                                                       |
|                                                                |                        |                   |        | 1<br>2 | 1 |   |   | Seasoning         | Lentisk, added to cake as a condiment                                             |
| <i>Pistacia palaestina</i> Boiss. *                            | <i>Butum Falastini</i> | 10                |        | 8      |   |   | 2 | Fruits            | Fruits, stewed and eaten                                                          |
|                                                                |                        |                   |        |        |   |   | 2 | Seasoning         | Buds, added to thyme as a condiment                                               |
| <i>Rhus coriaria</i> L. *                                      | <i>Summak</i>          | 51                | 2<br>3 | 1<br>1 | 6 | 4 | 7 | Seasoning         | Fruits, use as condiment on food and thyme                                        |
| <b>Apiaceae (Umbeliferae)</b>                                  |                        |                   |        |        |   |   |   |                   |                                                                                   |
| <i>Ammi visnaga</i> (L.) *                                     | <i>Kheleh</i>          | 3                 |        | 1      |   |   |   | Herbal tea        | Seeds, as herbal tea                                                              |
|                                                                |                        |                   |        | 2      |   |   |   | Vegetables        | Inflorescence, and leaves, are added to salty preserved food                      |
| <i>Eryngium creticum</i> Lam. *                                | <i>Qarsa'neh</i>       | 10                | 1      | 7      | 1 | 1 |   | Vegetables        | Leaves and stems, eaten raw as salad with garlic and yoghurt, or cooked as pastry |
| <i>Daucus carota</i> L. ssp. <i>maximus</i> (Desf.) Ball       | <i>Jazar Barri</i>     | 3                 |        | 3      |   |   |   | Vegetables        | Fleshy roots, eaten raw                                                           |
| <i>Anisum vulgare</i> Gaertn. ( <i>Pimpenella anisum</i> L.) * | <i>Yansoon</i>         | 61                | 1<br>5 | 1      |   | 6 | 3 | Herbal tea        | Seeds, as herbal tea                                                              |
|                                                                |                        |                   | 1<br>8 | 1<br>0 | 1 |   |   | Fruits            | Seeds, used to make cake and sweets                                               |
|                                                                |                        |                   | 1      |        | 2 | 7 | 6 | Seasoning         | Seeds, used in cake as a condiment                                                |

|                                           |                         |    |    |    |   |    |    |                   |                                                 |
|-------------------------------------------|-------------------------|----|----|----|---|----|----|-------------------|-------------------------------------------------|
| <i>Foeniculum vulgare</i> Mill. *         | <i>Shomar</i>           | 87 | 18 | 1  |   |    |    | Herbal tea        | Seeds, as herbal tea                            |
|                                           |                         |    | 2  | 1  | 1 | 2  | 4  | Food decoration   | Seeds, boiled and added to bread                |
|                                           |                         |    | 2  |    |   |    |    | Food Preservation | Leaves, dried and added to pickles              |
|                                           |                         |    | 3  |    | 3 | 2  | 10 | Fruits            | Foliage, eaten raw                              |
|                                           |                         |    | 12 | 11 | 5 | 3  | 8  | Seasoning         | Foliage, dried and added to cake as a condiment |
|                                           |                         |    | 10 | 17 | 2 | 6  |    | Vegetables        | Foliage, eaten raw as salad, or cooked as soup  |
| <b>Araceae</b>                            |                         |    |    |    |   |    |    |                   |                                                 |
| <i>Eminium spiculatum</i> (Blume) Kuntze* | <i>Smaia'</i>           | 12 | 2  | 4  |   |    | 6  | Vegetables        | Leaves, raw, added to salad                     |
| <i>Arum palaestinum</i> Boiss *           | <i>Lufe</i>             | 84 | 5  |    |   | 2  |    | Herbal tea        | Leaves, as herbal tea                           |
|                                           |                         |    | 10 | 37 | 9 | 14 | 11 | Vegetables        | Leaves, cooked                                  |
| <b>Asteraceae (Compositae)</b>            |                         |    |    |    |   |    |    |                   |                                                 |
| <i>Scorzonera papposa</i> DC.             | <i>Makhadet Alarous</i> | 23 | 10 | 7  |   |    | 6  | Vegetables        | Stem and leaves, raw as salad, eaten raw        |
| <i>Silybum marianum</i> (L.) Gaertn. *    | <i>Sinnariah</i>        | 13 | 6  | 2  | 4 | 1  |    | Vegetables        | Stem, and seeds, cooked as soup, eaten raw      |
| <i>Tragopogon coelesyriacus</i> Boiss. *  | <i>Thennabeh Faras</i>  | 15 | 5  | 6  |   |    | 4  | Vegetables        | Stem, eaten raw                                 |
| <i>Chrysanthemum coronarium</i> L. *      | <i>Bisbas</i>           | 10 | 1  |    |   |    |    | Herbal tea        | Inflorescence, herbal tea                       |
|                                           |                         |    | 2  |    |   |    |    | Seasoning         | Foliage, added to fish as condiment             |
|                                           |                         |    | 2  | 3  | 1 | 1  |    | Vegetables        | Stems, eaten raw                                |
| <i>Anthemis palestina</i> Reut. *         | <i>Oqhuwan</i>          | 7  | 3  | 1  | 2 | 1  |    | Herbal tea        | Inflorescence, as herbal tea                    |
| <i>Carlina hispanica</i> Lam.             | <i>Zind Abd</i>         | 7  | 1  | 6  |   |    |    | Vegetables        | Leaves, eaten raw                               |
| <i>Onopordum carduiforme</i> Boiss        | <i>Za'keer</i>          | 4  | 3  |    | 1 |    |    | Vegetables        | Stems, eaten raw                                |
| <i>Centaurea dumulosa</i> Boiss *         | <i>Murrar</i>           | 38 | 11 | 16 | 3 |    | 8  | Vegetables        | Stem, eaten cooked, or raw as salad             |

|                                              |                      |    |    |    |    |    |    |                 |                                                           |
|----------------------------------------------|----------------------|----|----|----|----|----|----|-----------------|-----------------------------------------------------------|
| <i>Cichorium pumilum</i> Jacq. *             | <i>Hendba'</i>       | 70 | 50 | 6  | 12 | 1  | 1  | Vegetables      | Leaves, boiled and eaten as salad with yoghurt            |
| <i>Gundelia tournefortii</i> L. *            | <i>Akoob</i>         | 99 | 48 | 12 | 7  | 16 | 16 | Vegetables      | Young stems, inflorescence, cooked with meat and yoghurt. |
| <i>Lactuca saligna</i> L. *                  | <i>Khus Barri</i>    | 37 | 10 | 15 | 4  | 2  | 4  | Vegetables      | Leaves, eaten raw as salad, or eaten raw                  |
| <i>Matricaria aurea</i> (Loefl.) Sch. Bip. * | <i>Babounej</i>      | 83 | 41 | 13 | 3  | 9  | 10 | Herbal tea      | Inflorescence, as herbal tea                              |
|                                              |                      |    | 1  | 2  | 1  | 11 |    | Seasoning       | Foliage, added to tea as a condiment                      |
| <i>Notobasis syriaca</i> (L.) Cass. *        | <i>Khurfaish</i>     | 41 | 16 | 15 | 6  |    | 4  | Vegetables      | Stems, eaten raw                                          |
| <b>Boraginaceae</b>                          |                      |    |    |    |    |    |    |                 |                                                           |
| <i>Anchusa strigosa</i> Banks & Sol.         | <i>Hemhem</i>        | 10 |    |    | 3  |    |    | Herbal tea      | Inflorescence, raw as juice                               |
|                                              |                      |    | 1  | 3  |    |    | 3  | Vegetables      | Leaves, eaten raw as salad                                |
| <b>Brassicaceae (Cruciferae)</b>             |                      |    |    |    |    |    |    |                 |                                                           |
| <i>Sinapis arvensis</i> L. *                 | <i>Khardal Barri</i> | 34 | 1  |    |    |    |    | Seasoning       | Seeds, added to food as condiment                         |
|                                              |                      |    | 24 | 1  | 6  | 3  |    | Vegetables      | Leaves and stem, eaten raw, or added to salad             |
| <i>Lepidium sativum</i> L. *                 | <i>Rashad</i>        | 16 |    | 1  | 2  |    |    | Food decoration | Foliage, added to food for decoration                     |
|                                              |                      |    | 13 |    | 1  |    |    | Vegetables      | Leaves, raw as salad                                      |
| <i>Diplotaxis eruroides</i> (L.) DC. *       | <i>Hewaireh</i>      | 8  | 6  |    | 2  |    |    | Vegetables      | Stem, eaten raw, or added to salad                        |
| <i>Raphanus rostratus</i> DC.                | <i>Fijjaileh</i>     | 3  | 3  |    |    |    |    | Seasoning       | Foliage, eaten raw                                        |
| <i>Eruca sativa</i> Miller *                 | <i>Jarjeer</i>       | 48 | 25 | 10 | 3  | 6  | 4  | Vegetables      | Foliage, eaten raw as salad                               |
| <b>Capparidaceae</b>                         |                      |    |    |    |    |    |    |                 |                                                           |
| <i>Capparis spinosa</i> L. *                 | <i>Cappar</i>        | 3  |    |    | 1  |    | 2  | Vegetables      | Fruits, preserved as pickles                              |
| <b>Caryophyllaceae</b>                       |                      |    |    |    |    |    |    |                 |                                                           |
| <i>Paronychia argentea</i> Lam. *            | <i>Rijl Hamameh</i>  | 10 | 3  | 1  |    |    | 2  | Herbal tea      | Foliage, herbal tea                                       |
|                                              |                      |    | 4  | 2  |    |    | 4  | Vegetables      | Foliage, cooked as pastry or eaten raw                    |

|                                                               |                    |    |    |    |   |   |   |            |                                                                 |
|---------------------------------------------------------------|--------------------|----|----|----|---|---|---|------------|-----------------------------------------------------------------|
| <b>Fabaceae (Leguminosae, Papilionaceae)</b>                  |                    |    |    |    |   |   |   |            |                                                                 |
| <i>Vicia narbonensis</i> L.                                   | <i>Burraideh</i>   | 19 | 6  | 8  |   |   | 5 | Vegetables | Seeds, cooked as snack, eaten raw or roasted                    |
| <i>Lathyrus blepharicarpus</i> Boiss.                         | <i>Saisa'</i>      | 31 | 9  | 16 |   | 3 | 3 | Fruits     | Fruits, eaten raw                                               |
| <i>Trigonella</i> sp. *                                       | <i>Hellaibeh</i>   | 9  | 9  |    |   |   |   | Fruits     | Seeds, fleshy seeds eaten raw                                   |
| <i>Glycyrrhiza glabra</i> L.                                  | <i>Irq sous</i>    | 5  | 5  |    |   |   |   | Herbal tea | Leaves and fruits, dried and prepared as juice                  |
| <i>Psoralea bituminosa</i> L.                                 | <i>Owaineh</i>     | 9  | 1  | 1  | 7 |   |   | Vegetables | Fruits, stewed and eaten, or cooked as pastry, eaten raw        |
| <i>Cassia senna</i> L. *                                      | <i>Sanamokeh</i>   | 3  |    | 1  |   | 2 |   | Herbal tea | Leaves, as herbal tea                                           |
| <i>Ceratonia siliqua</i> L. *                                 | <i>Karoob</i>      | 53 | 12 | 25 | 4 | 5 | 8 | Fruits     | Fruits, eaten raw, prepared as jam, cooked and eaten with bread |
| <i>Tetragonolobus palaestinus</i> Boiss. & Blanche            | <i>Saiba'h</i>     | 36 | 10 | 17 | 5 | 4 |   | Vegetables | Fruits, eaten raw                                               |
|                                                               |                    |    | 11 | 14 | 5 | 4 |   | Fruits     | Fruits, eaten raw                                               |
| <i>Trigonella foenum-graecum</i> L. *                         | <i>Hilbeh</i>      | 75 | 18 |    |   | 5 | 7 | Herbal tea | Seeds, as herbal tea                                            |
|                                                               |                    |    | 16 | 16 | 2 | 6 | 5 | Fruits     | Seeds, cooked to make sweets                                    |
|                                                               |                    |    | 8  | 7  | 5 | 6 |   | Vegetables | Seeds, cooked as snack                                          |
| <b>Fagaceae</b>                                               |                    |    |    |    |   |   |   |            |                                                                 |
| <i>Quercus calliprinos</i> Webb. *                            | <i>Sendian</i>     | 22 |    | 17 | 2 |   |   | Herbal tea | Fruits, dried and grounded then added to coffee                 |
|                                                               |                    |    |    |    | 2 | 1 | 2 | Fruits     | Fruits, roasted                                                 |
| <b>Geraniaceae</b>                                            |                    |    |    |    |   |   |   |            |                                                                 |
| <i>Erodium gruinum</i> (L.) L'Her                             | <i>Ibret Ajouz</i> | 4  | 2  |    |   |   | 2 | Vegetables | Stems, cooked and eaten as snack, or eaten raw                  |
| <b>Iridaceae</b>                                              |                    |    |    |    |   |   |   |            |                                                                 |
| <i>Crocus hermoneus</i> subsp. <i>palaestinus</i> N. Feinbrun | <i>Um Qais</i>     | 12 | 8  | 4  |   |   |   | Vegetables | Bulbs, roasted                                                  |
| <i>Crocus hyemalis</i> Boiss. & Blanche *                     | <i>Bizazeh</i>     | 8  | 4  | 3  | 1 |   |   | Vegetables | Bulbs, roasted                                                  |
| <i>Crocus sativus</i> L. *                                    | <i>Za'faran</i>    | 5  | 4  |    |   |   | 1 | Seasoning  | Leaves, added for food as a condiment                           |

| Lamiaceae (Labiatae)                         |                     |     |    |    |    |    |    |                 |                                                                   |
|----------------------------------------------|---------------------|-----|----|----|----|----|----|-----------------|-------------------------------------------------------------------|
| <i>Teucrium polium</i> L. *                  | <i>Jedeh Subian</i> | 27  | 8  |    | 2  | 1  | 2  | Herbal tea      | Leaves, herbal tea                                                |
|                                              |                     |     |    | 9  | 4  | 1  |    | Vegetables      | Leaves, cooked as soup, cooked with egg, wheat, and water) omelet |
| <i>Coridothymus capitatus</i> (L.) Reichb. * | <i>Za'tar Farsi</i> | 25  | 7  |    |    | 2  |    | Herbal tea      | Leaves, herbal tea                                                |
|                                              |                     |     | 1  |    |    |    |    | Seasoning       | Leaves, raw added to pickles                                      |
|                                              |                     |     | 11 | 3  | 1  |    | 2  | Vegetables      | Leaves, dried and added to thyme                                  |
| <i>Origanum majorana</i> L. *                | <i>Mardaquoush</i>  | 7   | 6  |    | 1  |    |    | Herbal tea      | Foliage, herbal tea                                               |
| <i>Majorana syriaca</i> (L.) Rafin. *        | <i>Za'tar Barri</i> | 150 | 22 |    |    | 6  | 4  | Herbal tea      | Leaves, as herbal tea                                             |
|                                              |                     |     |    |    | 2  |    |    | Food decoration | Leaves, fresh leaves added to food for decoration                 |
|                                              |                     |     | 2  | 7  |    | 3  | 11 | Seasoning       | Leaves, added to meat as a condiment                              |
|                                              |                     |     | 35 | 35 | 14 | 28 | 18 | Vegetables      | Leaves, cooked as pastry, dried and mixed with wheat, salt, ...   |
| <i>Mentha longifolia</i> L. *                | <i>Na'na' Barri</i> | 25  | 12 |    |    |    | 2  | Herbal tea      | Leaves, as herbal tea                                             |
|                                              |                     |     | 2  |    | 1  |    |    | Food decoration | Leaves, cooked as pastry                                          |
|                                              |                     |     | 1  |    |    |    | 1  | Seasoning       | Leaves, added to salad                                            |
|                                              |                     |     | 3  |    | 5  |    | 3  | Vegetables      | Leaves, dried and added to thyme                                  |
| <i>Micromeria fruticosa</i> (L.) Druce. *    | <i>Za'tar Balat</i> | 79  | 9  | 3  | 2  | 1  | 5  | Herbal tea      | Leaves, as herbal tea                                             |
|                                              |                     |     |    |    |    | 2  |    | Food Decoration | Leaves added to salad                                             |
|                                              |                     |     | 4  | 6  | 6  |    | 14 | Seasoning       | Leaves, added to tea, or used as a condiment                      |
|                                              |                     |     |    | 27 |    | 4  | 1  | Vegetables      | Leaves, cooked as pastry                                          |
| <i>Salvia fruticosa</i> Mill. *              | <i>Mariamieh</i>    | 131 | 40 | 35 |    | 19 | 7  | Herbal tea      | Foliage, herbal tea                                               |
|                                              |                     |     | 7  | 3  | 10 | 3  | 10 | Seasoning       | Leaves, added to tea                                              |
| <i>Salvia hierosolymitana</i> Boiss. *       | <i>Lessaineh</i>    | 69  | 18 | 16 | 11 | 13 | 11 | Vegetables      | Leaves, eaten cooked with rice and meat                           |

|                                           |                    |     |    |    |    |    |    |                   |                                                                    |
|-------------------------------------------|--------------------|-----|----|----|----|----|----|-------------------|--------------------------------------------------------------------|
| <b>Lauraceae</b>                          |                    |     |    |    |    |    |    |                   |                                                                    |
| <i>Laurus nobilis</i> L. *                | <i>Ghar</i>        | 40  | 21 | 13 | 1  | 3  | 2  | Seasoning         | Leaves, added to food as a condiment                               |
| <b>Liliaceae</b>                          |                    |     |    |    |    |    |    |                   |                                                                    |
| <i>Allium ampeloprasum</i> L. *           | <i>Thoum Barri</i> | 37  | 7  |    |    |    |    | Food preservation | Leaves, added to pickles                                           |
|                                           |                    |     | 14 |    |    | 1  | 2  | Seasoning         | Foliage, used as condiment on food                                 |
|                                           |                    |     | 17 | 4  |    |    |    | Vegetables        | Leaves, eaten raw with bread                                       |
| <i>Asparagus aphyllus</i> L. *            | <i>Halion</i>      | 9   | 6  |    | 2  |    | 1  | Vegetables        | Stems, cooked as a snack                                           |
| <i>Asphodeline lutea</i> (L.) Reichenb. * | <i>Otaat</i>       | 11  | 10 | 1  |    |    |    | Vegetables        | Stems, raw as snack                                                |
| <b>Malvaceae</b>                          |                    |     |    |    |    |    |    |                   |                                                                    |
| <i>Malva sylvestris</i> L. *              | <i>Khubbaizeh</i>  | 129 | 50 | 35 | 14 | 18 | 12 | Vegetables        | Leaves, cooked as a snack, or cooked and eaten with rice           |
| <b>Myrtaceae</b>                          |                    |     |    |    |    |    |    |                   |                                                                    |
| <i>Myrtus communis</i> L. *               | <i>Reehan</i>      | 15  | 5  |    |    |    | 1  | Herbal tea        | Leaves, added to tea                                               |
|                                           |                    |     | 3  | 2  |    |    | 2  | Food decoration   | Leaves, raw in salads                                              |
|                                           |                    |     | 4  | 1  |    |    | 4  | Seasoning         | Leaves, added to food as condiment                                 |
| <b>Oxalidaceae</b>                        |                    |     |    |    |    |    |    |                   |                                                                    |
| <i>Oxalis pes-caprae</i> L.               | <i>Hamsees</i>     | 13  |    | 12 |    |    | 1  | Vegetables        | Leaves, cooked as pastry                                           |
| <b>Polygonaceae</b>                       |                    |     |    |    |    |    |    |                   |                                                                    |
| <i>Rumex acetosa</i> L. *                 | <i>Hummaid</i>     | 84  | 34 | 30 | 11 | 8  | 1  | Vegetables        | Leaves, cooked as pastry, or eaten raw as salad                    |
| <i>Rumex patientia</i> L. *               | <i>Salq</i>        | 39  | 15 | 8  | 11 |    | 5  | Vegetables        | Leaves, cooked with meat, or prepared as pastry , or added to soup |
| <b>Portulacaceae</b>                      |                    |     |    |    |    |    |    |                   |                                                                    |
| <i>Portulaca oleracea</i> L. *            | <i>Baqleh</i>      | 49  | 22 | 13 | 7  | 3  | 4  | Vegetables        | Foliage, cooked or eaten raw as salad                              |

|                                                      |                   |    |    |    |   |    |    |                 |                                                       |
|------------------------------------------------------|-------------------|----|----|----|---|----|----|-----------------|-------------------------------------------------------|
| <b>Primulaceae</b>                                   |                   |    |    |    |   |    |    |                 |                                                       |
| <i>Cyclamen persicum</i> Miller *                    | <i>Za'matoot</i>  | 99 | 24 | 34 | 7 | 18 | 16 | Vegetables      | Leaves, cooked with rice and meat, or raw as salad    |
| <b>Rhamnaceae</b>                                    |                   |    |    |    |   |    |    |                 |                                                       |
| <i>Ziziphus sativa</i> Gaetn.                        | <i>Innab</i>      | 5  | 1  | 3  | 1 |    |    | Fruits          | Fruits, eaten raw                                     |
| <i>Ziziphus spina-christi</i> (L.) Mill. *           | <i>Seder</i>      | 10 |    | 1  |   |    |    | Fruits          | Fruits, eaten raw                                     |
|                                                      |                   |    |    | 9  |   |    | 1  | Vegetables      | Leaves, cooked and eaten as snack                     |
| <b>Rosaceae</b>                                      |                   |    |    |    |   |    |    |                 |                                                       |
| <i>Pyrus syriaca</i> Boiss *                         | <i>Ajas Barri</i> | 18 | 13 | 1  | 3 | 1  |    | Fruits          | Fruits, eaten raw                                     |
| <i>Prunus mahaleb</i> L. ( <i>Cerasus mahaleb</i> )* | <i>Mahleb</i>     | 17 |    | 2  |   |    |    | Herbal tea      | Seeds, herbal tea                                     |
|                                                      |                   |    | 11 | 2  | 1 | 1  | 1  | Seasoning       | Seed, added to stored cheese as a condiment           |
| <i>Rubus sanctus</i> Schreb. *                       | <i>Ollaiq</i>     | 12 | 11 | 1  |   |    |    | Fruits          | Fruits, eaten raw, or prepared as jam                 |
| <i>Amygdalus communis</i> L. *                       | <i>Louz Hilo</i>  | 5  | 1  |    | 2 |    |    | Food decoration | Seeds, cooked and added to food                       |
|                                                      |                   |    | 1  |    | 3 |    |    | Fruits          | Fruits, eaten raw                                     |
|                                                      |                   |    |    |    | 1 |    |    | Seasoning       | Seed, dried added to sweets                           |
|                                                      |                   |    |    |    | 1 |    |    | Vegetables      | Seeds eaten raw                                       |
| <i>Amygdalus korschinskii</i> Hand.-Mazz             | <i>Louz Barri</i> | 4  | 1  |    |   |    |    | Food decoration | Seeds, dried seed added at the surface of cooked rice |
|                                                      |                   |    | 1  | 1  |   |    |    | Fruits          | Seeds, cooked and added to food                       |
|                                                      |                   |    |    | 1  |   |    |    | Vegetables      | Fruits, preserved in salt solution pickles            |
| <i>Rosa centifolia</i> L.                            | <i>Ward Jouri</i> | 3  | 3  |    |   |    |    | Herbal tea      | Inflorescence, boiled and prepared as juice           |
| <i>Crataegus aronia</i> L. Bosc. Ex DC *             | <i>Za'roor</i>    | 58 | 20 | 24 | 3 | 3  | 8  | Fruits          | Fruits, eaten raw                                     |

|                                      |                         |    |    |    |   |   |   |            |                                       |
|--------------------------------------|-------------------------|----|----|----|---|---|---|------------|---------------------------------------|
| <b>Rutaceae</b>                      |                         |    |    |    |   |   |   |            |                                       |
| <i>Ruta chalepensis</i> L. *         | <i>Faijen</i>           | 10 | 2  |    | 1 |   |   | Herbal tea | Leaves, herbal tea                    |
|                                      |                         |    | 1  | 6  |   |   |   | Vegetables | Foliage, cooked or eaten raw as salad |
| <b>Solanaceae</b>                    |                         |    |    |    |   |   |   |            |                                       |
| <i>Mandragora autumnalis</i> Bertol. | <i>Tuffah<br/>Majan</i> | 7  | 3  | 1  | 3 |   |   | Fruits     | Fruits, eaten raw                     |
| <b>Urticaceae</b>                    |                         |    |    |    |   |   |   |            |                                       |
| <i>Urtica pilulifera</i> L. *        | <i>Qurrais</i>          | 48 | 15 |    | 3 | 2 | 6 | Herbal tea | Leaves, herbal tea                    |
|                                      |                         |    | 1  | 21 |   |   |   | Vegetables | Stem, eaten raw as salad              |

\* Used also as a medicinal plant
